# Supplementary figures and images for: Social capital and health: Does egalitarianism matter? A literature review
Source: Springer Nature journal article supplement (doi:10.1186/1475-9276-5-3), 2006-04-05

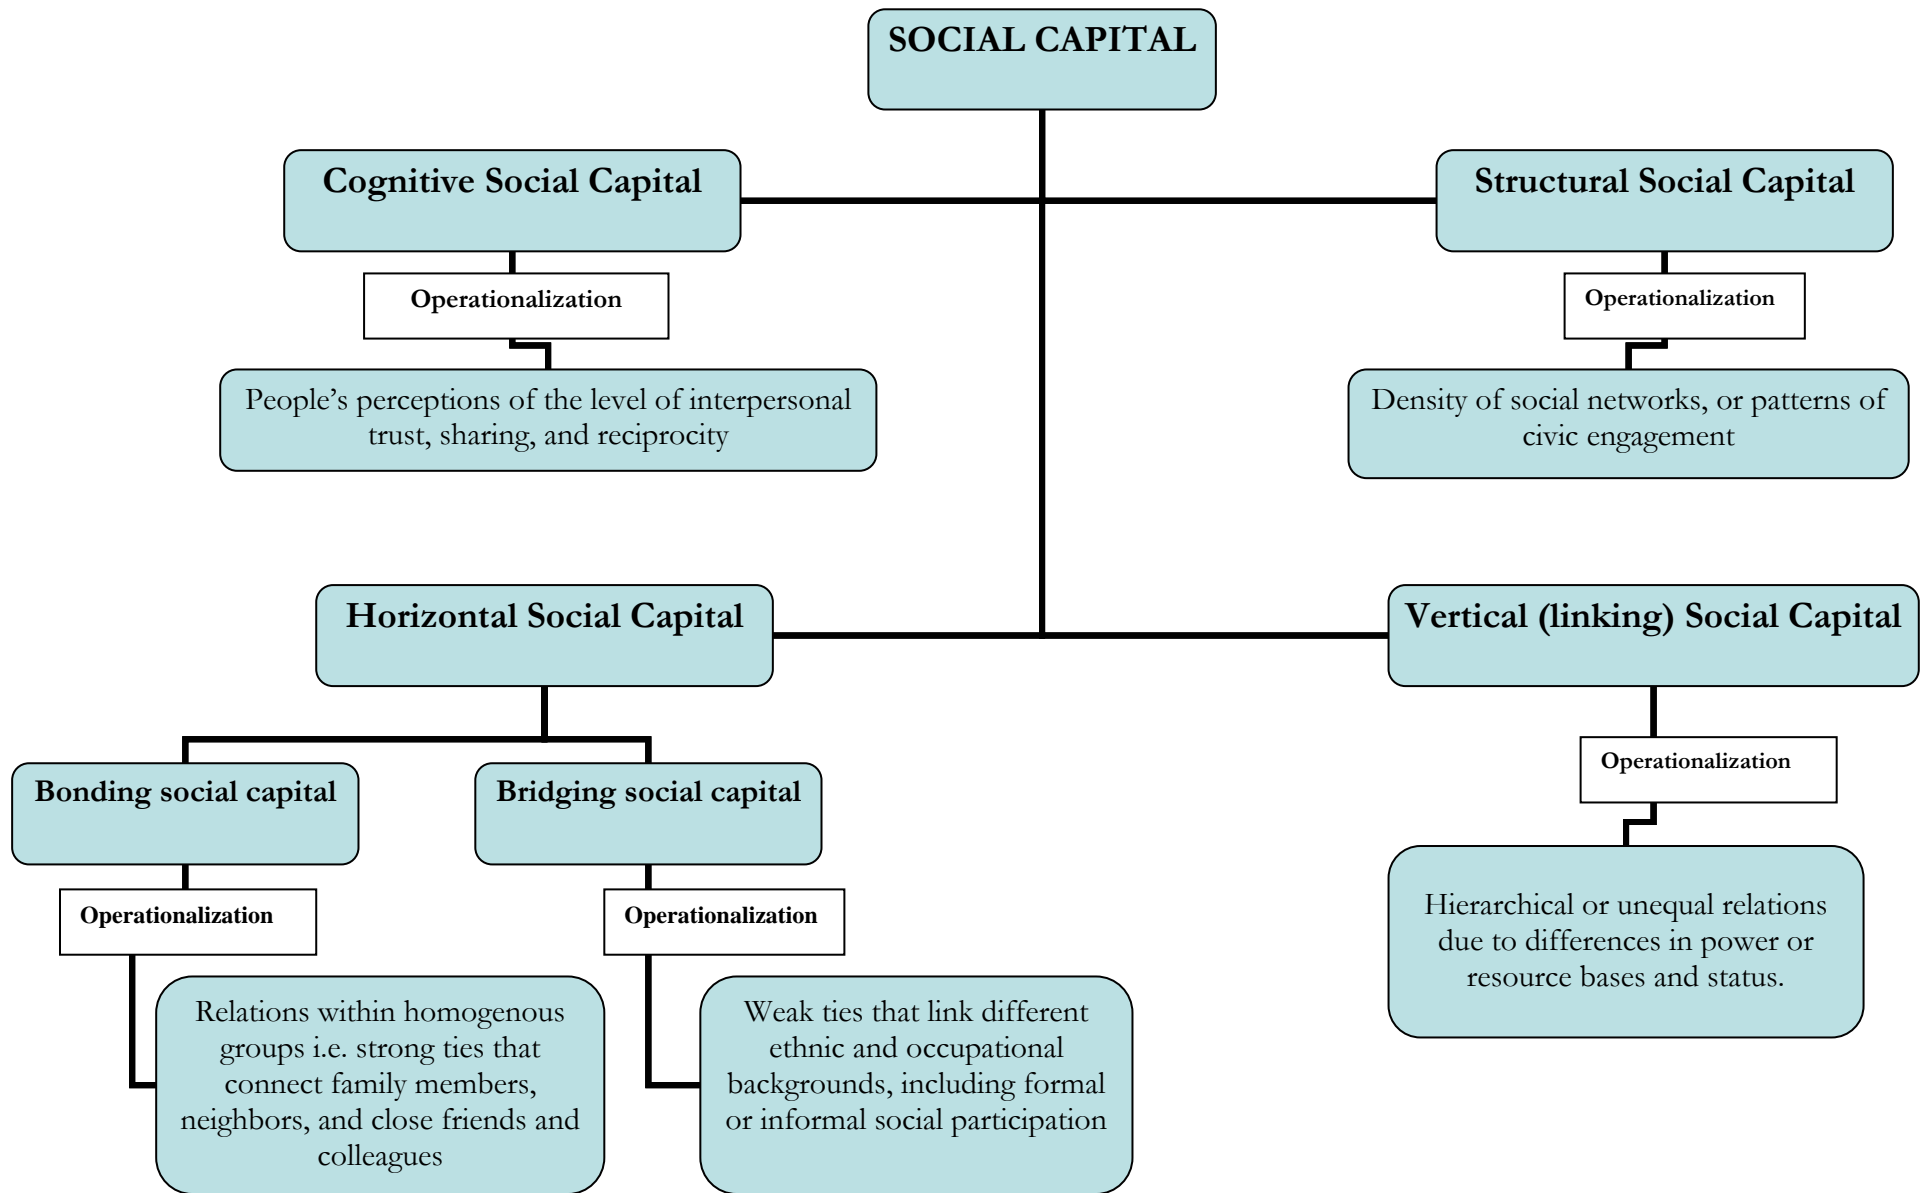

Supplement: 12939_2005_41_MOESM1_ESM.pdf [file 12939_2005_41_MOESM1_ESM.pdf]
